# Supplementary material
Source: publisher site journal article supplement (https://www.spandidos-publications.com/8598/downloadSupplementary)

Figure S1. (A) Comparison of ROC curves between the SOFA score alone and the combined model incorporating LAR. (B) ROC curve of the LAR for predicting 30-day mortality, with the optimal cut-off value indicated. LAR, lactate-to-albumin ratio; AUC, area under the curve; ROC, receiver operating characteristic; SOFA, Sequential Organ Failure Assessment; Sens, sensitivity; Spec, specificity.

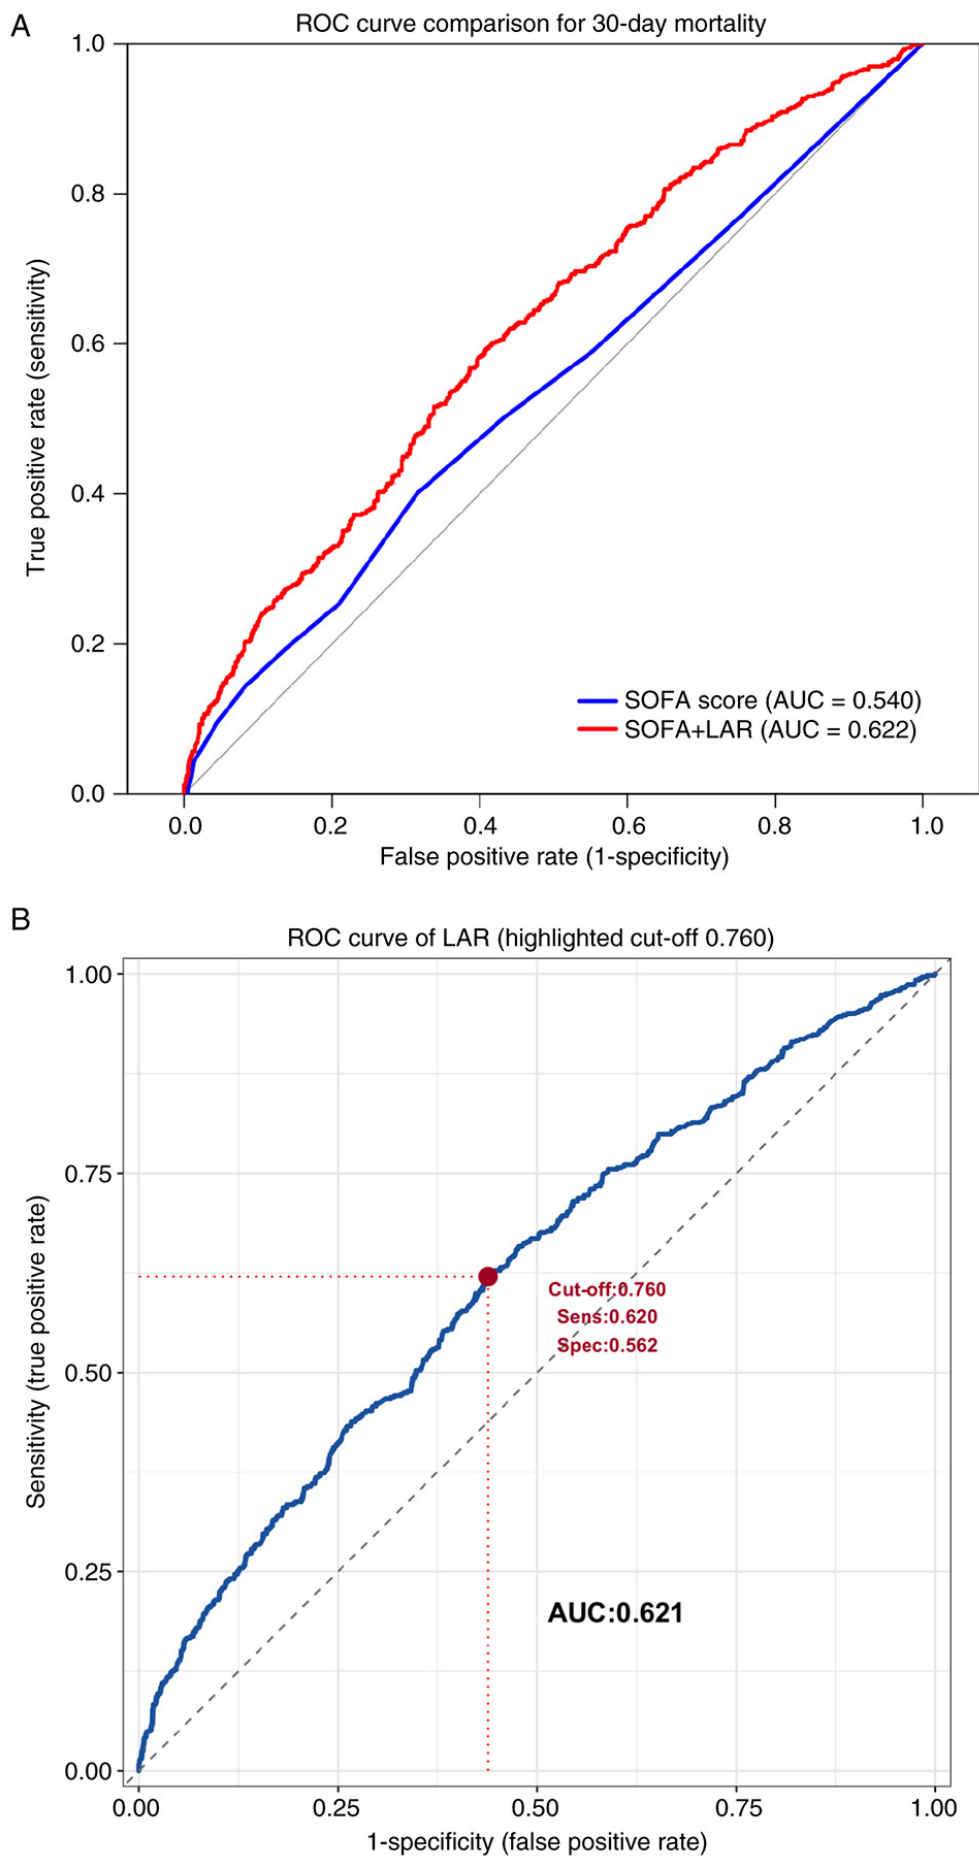

Supplement: Supplementary file 1 [file downloadSupplementary]
